# Supplementary material
Source: publisher site journal article supplement (https://www.degruyterbrill.com/publication/journal_key/ENG/downloadAsset/ENG_CFP%20ICESTA%202024%20and%20ICCEEAS%202024.pdf)
Supplement: Supplementary file 1 [file ENG_CFP%20ICESTA%202024%20and%20ICCEEAS%202024.pdf]

# THE 3rd INTERNATIONAL CONFERENCE ON ENERGY STORAGE TECHNOLOGY AND APPLICATIONS (ICESTA-2024) AND THE INTERNATIONAL CONFERENCE ON CHEMICAL ENGINEERING, ENVIRONMENT, AND APPLIED SCIENCE (ICCEEAS-2024)

## GUEST EDITORS

---

**Agus Purwanto**, Sebelas Maret University, Indonesia

**Hendri Widiyandari**, Sebelas Maret University, Indonesia

## DESCRIPTION

---

**Open Engineering** invites manuscripts for the Special Issue published in cooperation with **The 3rd International Conference on Energy Storage Technology and Applications (ICESTA-2024)** and **The International Conference on Chemical Engineering, Environment, and Applied Science (ICCEEAS-2024)**.

**ICESTA-2024** and **ICCEEAS-2024** are international scale events that are co-organized by the Centre of Excellence for Electrical Energy Storage Technology (CEFEEST) and Chemical Engineering Department of Sebelas Maret University, Indonesia.

**ICESTA-2024** and **ICCEEAS-2024** will gather professionals from various research institutes, universities, industries, governments, and students to share, discuss, and present current advances in energy storage technology for ICESTA-2024 and advances in chemical engineering, environmental and applied sciences for ICCEEAS-2024, both of which promote the Sustainability Development Goals (SDGs) in the respective areas or fields.

Topics of interests include (but are not limited) to the following aspects:

- Biological and chemical physics, physical chemistry
- Electronics and devices
- Environment and energy
- Instrumentation and measurement
- Materials physics, materials analysis and characterization
- Soft matter, liquids and polymers
- Surfaces, interfaces and thin films

More information about the Conference, such as deadlines and preliminary schedule, can be accessed at <https://icche2024.ft.uns.ac.id/>.

Authors are requested to submit their papers complying the general scope of the journal. The submitted papers will undergo the standard peer-review process before they can be accepted. Notification of acceptance will be communicated as we progress with the review process.

## HOW TO SUBMIT

---

Before submission authors should carefully read the [Instruction for Authors](#).

Manuscripts can be written in TeX, LaTeX - the journal's [LATEX template](#), or in standard DOCUMENT (.DOC). **For an initial submission, the authors are strongly advised to upload their entire manuscript, including tables and figures, as a single PDF file.**

All submissions to the Special Issue must be made electronically via online submission system Editorial Manager: [www.editorialmanager.com/openeng](http://www.editorialmanager.com/openeng)

All manuscripts will undergo the standard peer-review process (single blind, at least two independent reviewers). When entering your submission via online submission system please choose the option "**Special Issue: ICESTA-2024 and ICCEEAS-2024**".

Submission of a manuscript implies that the work described has not been published before as a whole or as a part in any medium by the authors or anyone else and it is not under consideration for publication elsewhere. For more details please see [Publishing Ethics](#) and documents available in the Supplementary Materials section at the [Open Engineering](#) website.

**The deadline for submissions is March 31, 2025**, but individual papers will be reviewed and published online on an ongoing basis.

Contributors to the Special Issue will benefit from:

- **indexation in SCOPUS and Web of Science**
- fixed APC that amounts to 500 EUR
- fair and constructive peer review provided by experts in the field no space constraints
- convenient, web-based paper submission and tracking system – Editorial Manager
- quick online publication upon completing the publishing process (continuous publication model)
- **liberal policies on copyrights** (authors retain copyrights) and on self-archiving (no embargo periods) \*\*
- better visibility due to Open Access
- long-term preservation of the content
- promotion of published papers to readers and citers

\*\* The use of article will be governed by the Creative-Commons Attribution license (CC-BY) [License to Publish document](#) (in PDF)

[Open Engineering](#) applies Article Processing Charges (APC), to cover costs of publication in open access. There is no submission fee.

**We are looking forward to your submission!**

In case of problems, please contact the Managing Editor ([natalia.mikolajczak@degruyter.com](mailto:natalia.mikolajczak@degruyter.com)) or Assistant Managing Editor ([AssistantManagingEditor@degruyter.com](mailto:AssistantManagingEditor@degruyter.com)) of [Open Engineering](#).

**[degruyter.com/view/j/eng](http://degruyter.com/view/j/eng)**
